# Supplementary material
Source: PubMed Central journal article supplement (PMC4855879)

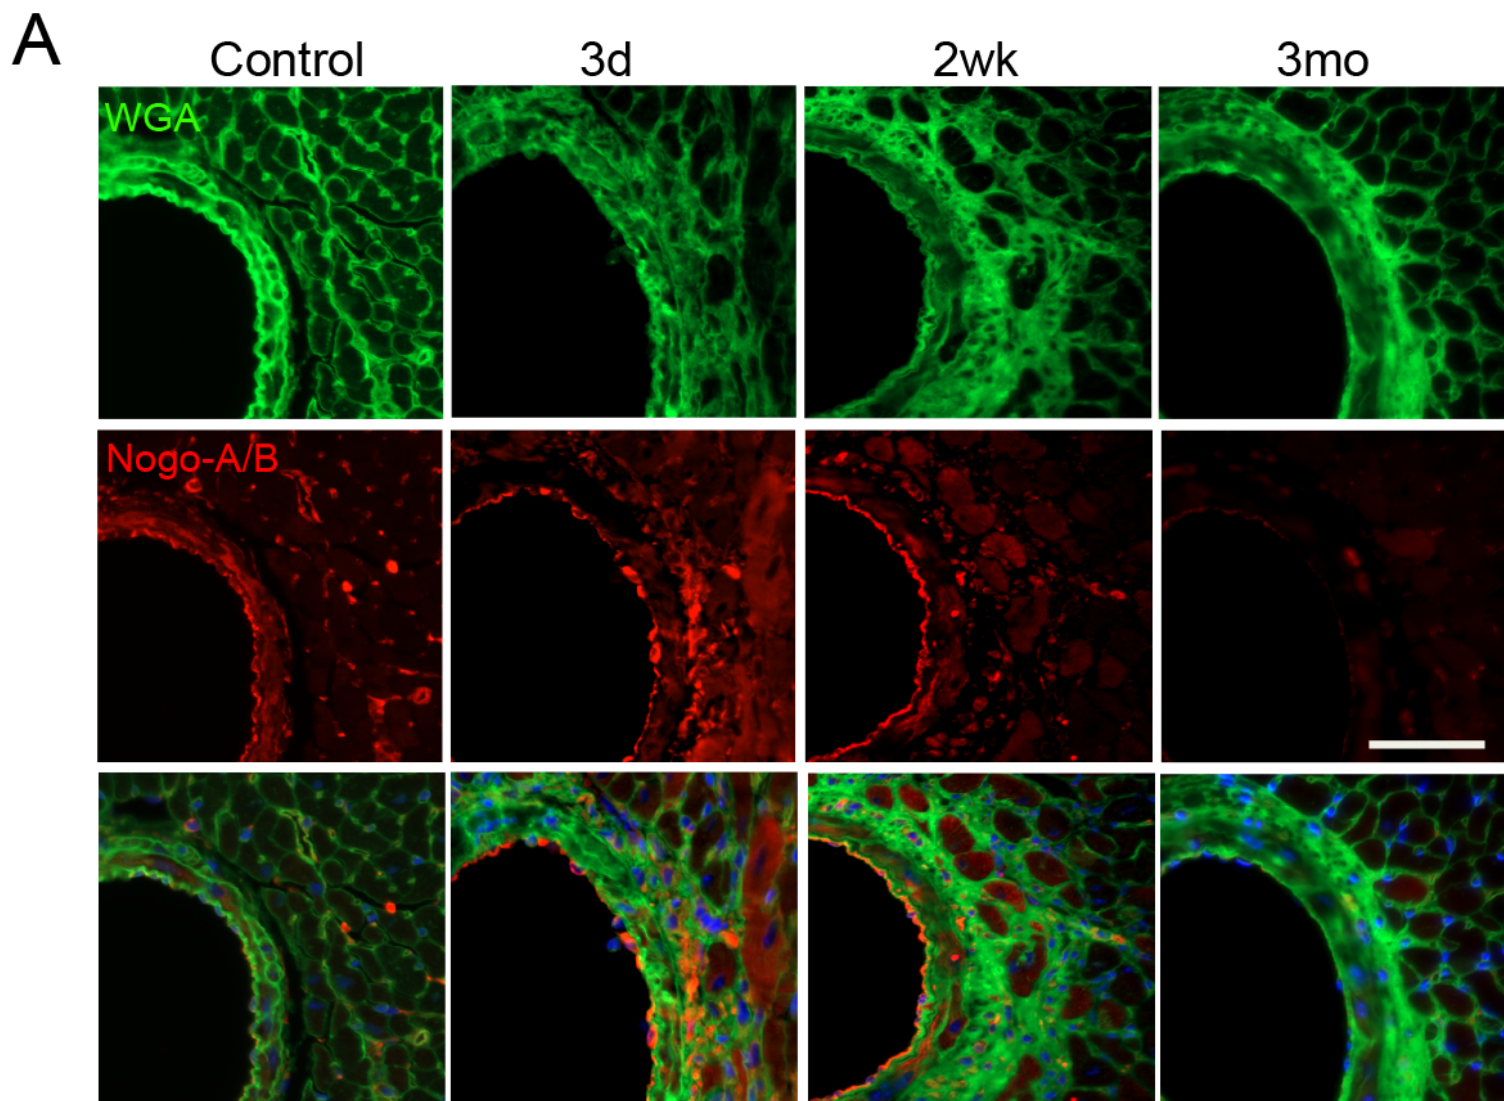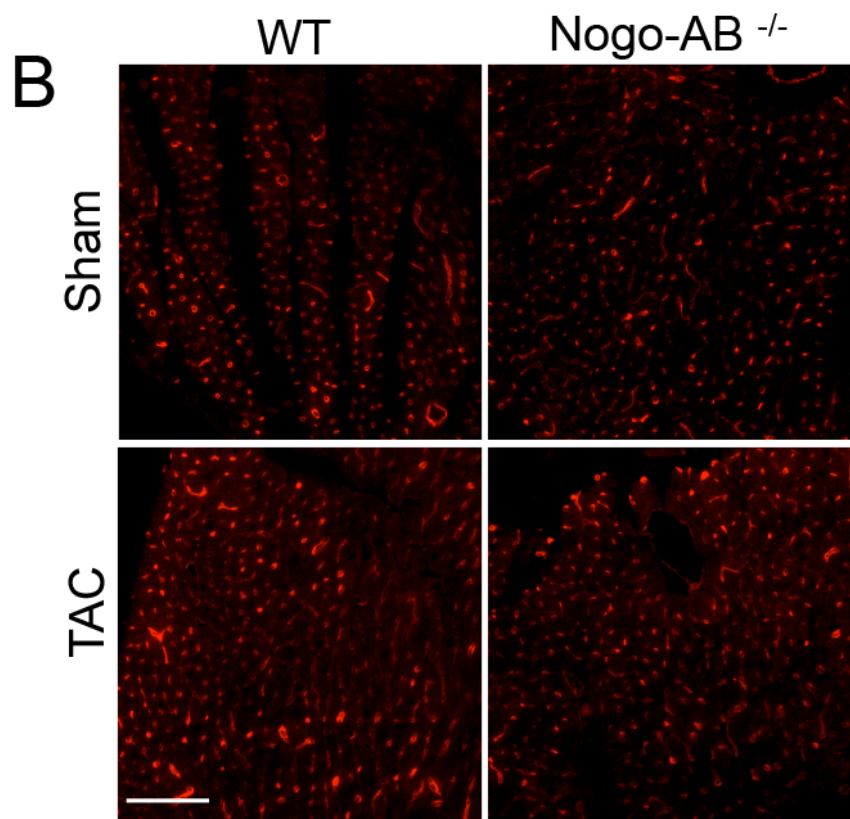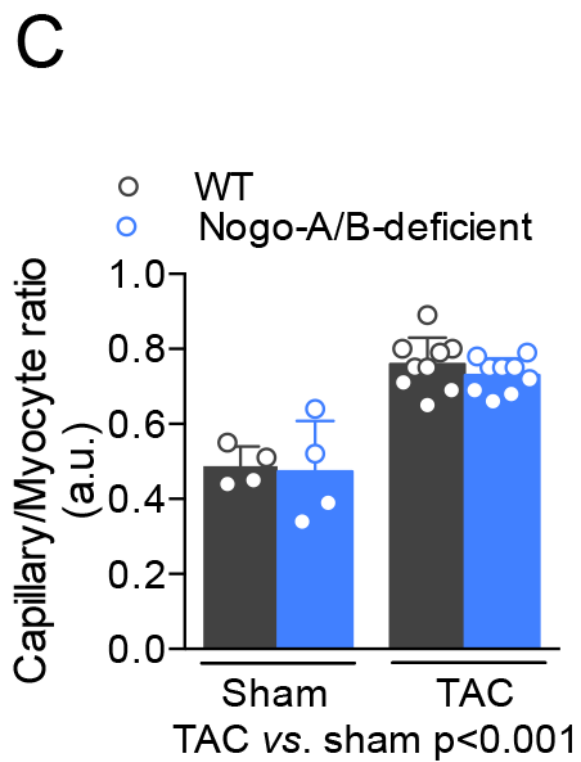

Supplementary Figure 1

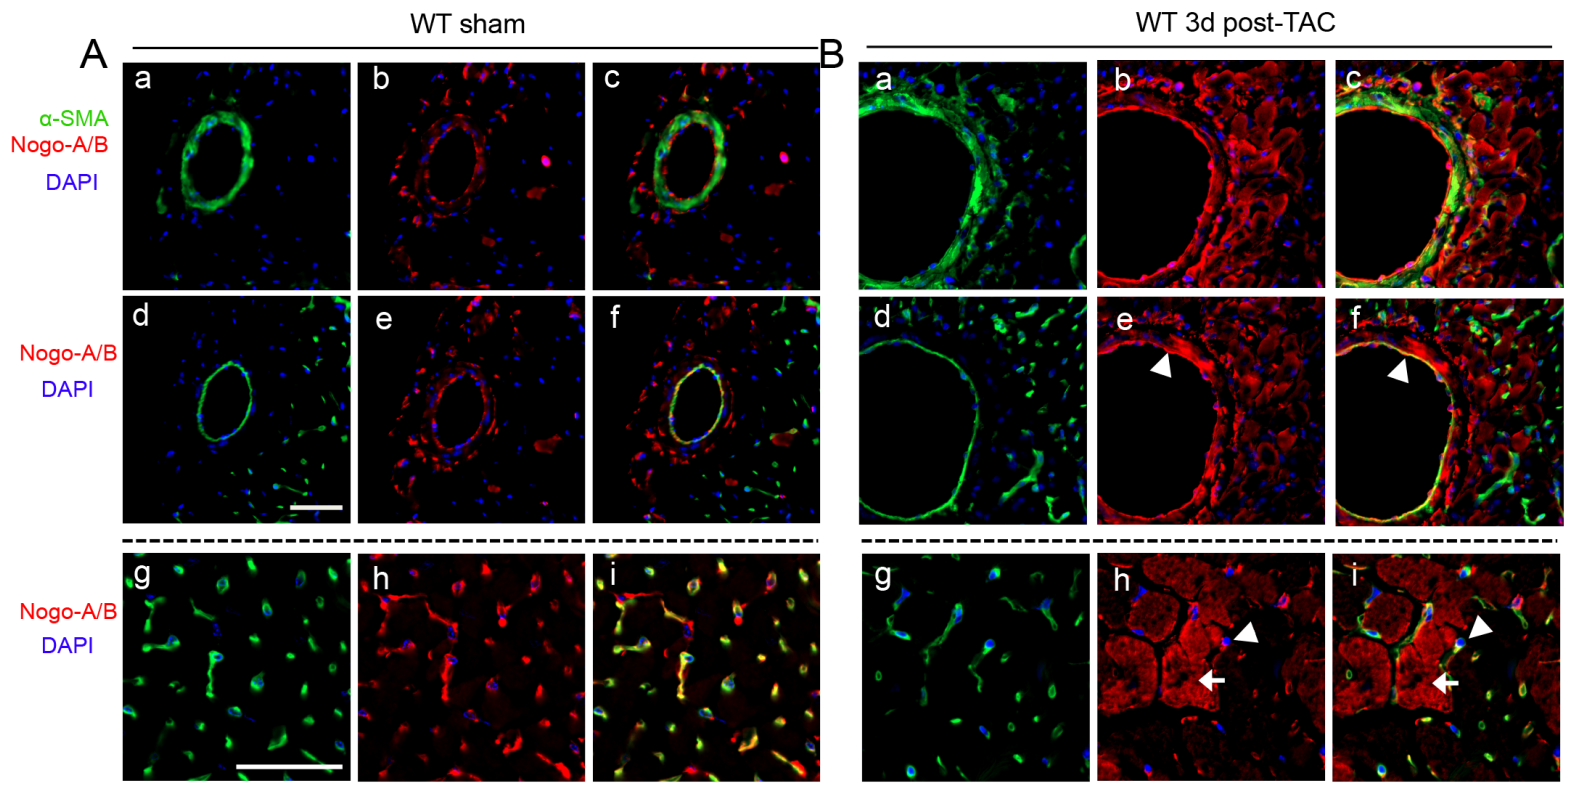

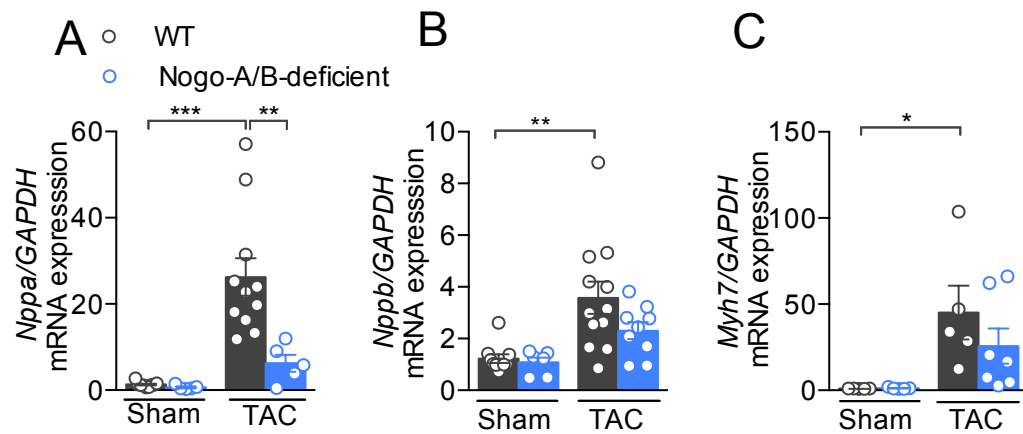

Supplementary Figure 3



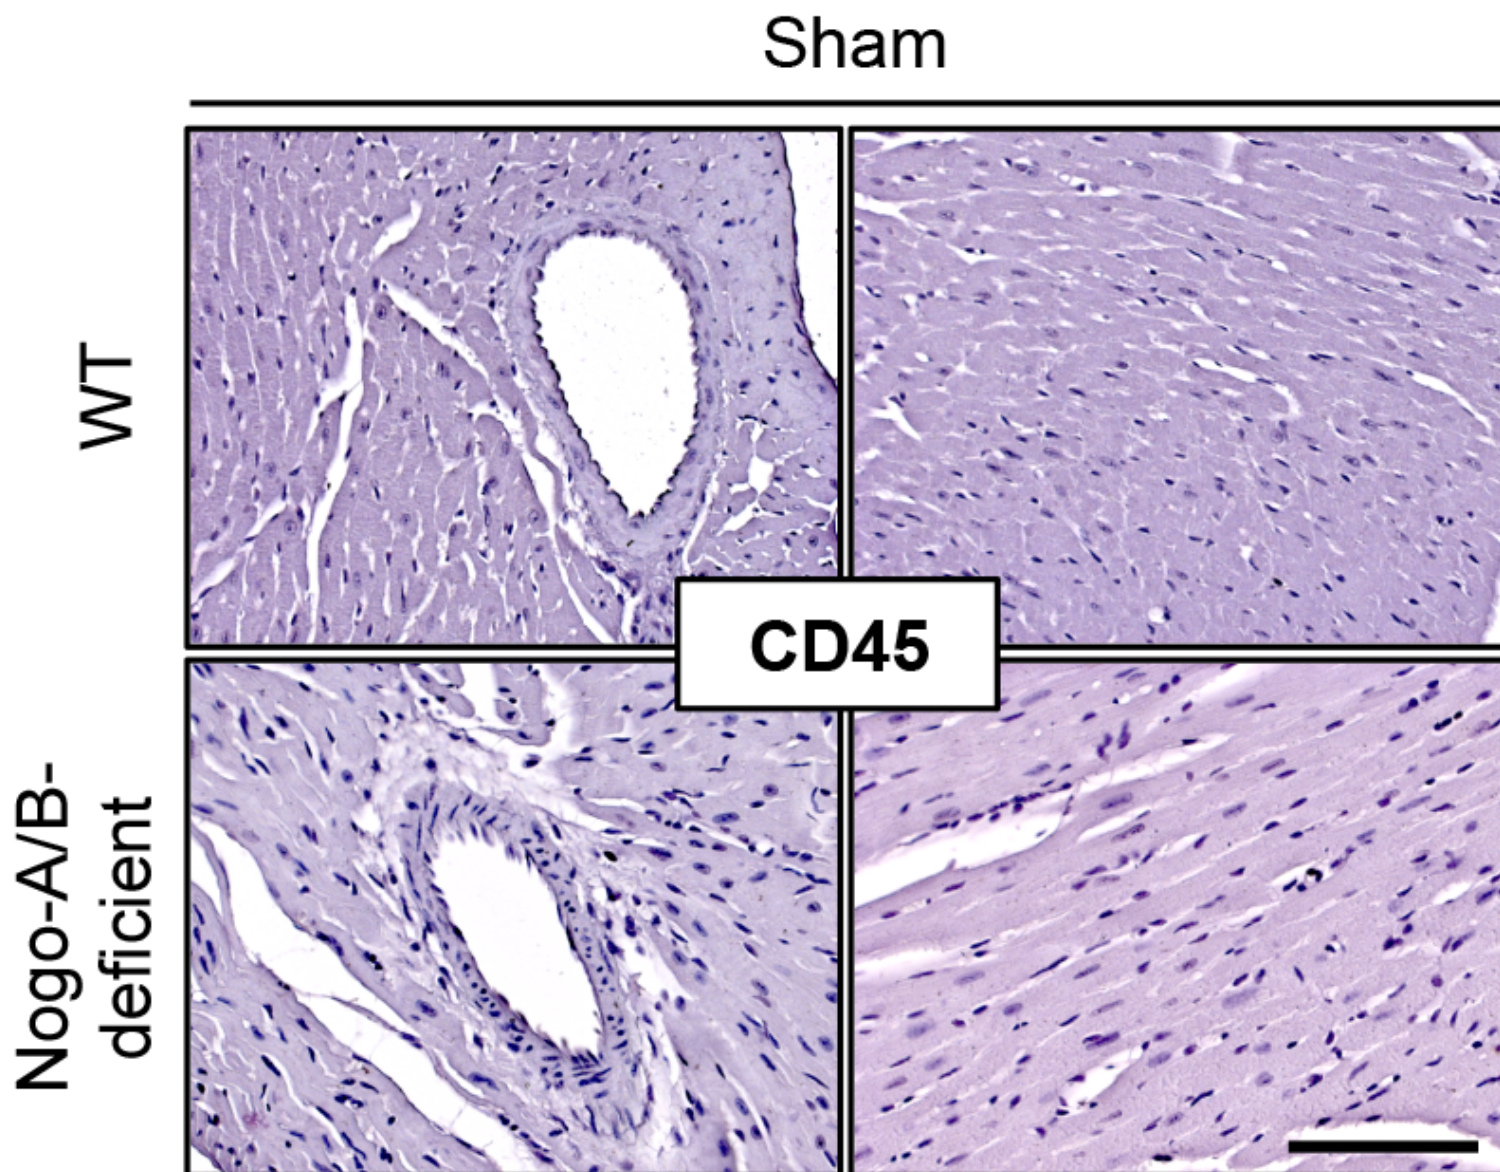

Supplementary Figure 4

Supplement: NIHMS781130-supplement-Supplemental_Data.pdf [file NIHMS781130-supplement-Supplemental_Data.pdf]
